# Supplementary material for: Serum Vascular Endothelial Growth Factor Levels in the IVAN Trial; Relationships with Drug, Dosing, and Systemic Serious Adverse Events
Source: PubMed Central journal article supplement — Ophthalmol Retina. 2018 Feb;2(2):118–27. doi: 10.1016/j.oret.2017.05.015 (PMC6278944; doi:10.1016/j.oret.2017.05.015), 2018-02
Supplement: mmc1.pdf [file mmc1.pdf]

**eTable 1 Details of events classified as IME**

|                                                                                         |                                   |                                                                         |
|-----------------------------------------------------------------------------------------|-----------------------------------|-------------------------------------------------------------------------|
| Arthralgia                                                                              | Duodenal ulcer                    | Pancreatitis                                                            |
| Atrial fibrillation*                                                                    | Facial paresis                    | Pneumonia                                                               |
| Cellulitis                                                                              | Hospitalisation for arthritis     | Pneumonia and Lower respiratory tract infection                         |
| Cholecystitis, Abdominal pain, Cholecystectomy, Intestinal obstruction and Pancreatitis | Hypersensitivity                  | Pneumonia, Lower respiratory tract infection, Gastroenteritis and Death |
| Cholecystitis infective                                                                 | Intestinal perforation            | Pneumonia and Vasculitis                                                |
| Chronic obstructive pulmonary disease                                                   | Lower respiratory tract infection | Sudden hearing loss                                                     |
| Chronic obstructive pulmonary disease                                                   | Meniere's disease                 | Thrombocytopenia, Mantle cell lymphoma and Death                        |
| Colitis                                                                                 | Multi-organ failure and Death     |                                                                         |
| Crohn's disease and Abdominal infection                                                 | Nasal polyps and Swelling         |                                                                         |

IME=immunologically-mediated events.

\* Other instances of AF were classified as OTH; this instance, which arose in conjunction with diarrhoea and weight loss, was classified as OTH by one assessor and IME by a second assessor with a consensus classification of IME.
