# Supplementary material for: Serum Vascular Endothelial Growth Factor Levels in the IVAN Trial; Relationships with Drug, Dosing, and Systemic Serious Adverse Events
Source: PubMed Central journal article supplement — Ophthalmol Retina. 2018 Feb;2(2):118–27. doi: 10.1016/j.oret.2017.05.015 (PMC6278944; doi:10.1016/j.oret.2017.05.015), 2018-02
Supplement: mmc2.pdf [file mmc2.pdf]

**eTable 2 Geometric mean sVEGF and mean and SD log<sub>e</sub>(sVEGF) across study visits by treatment arm**

|                               | Ranibizumab continuous (n=158) |                                    | Ranibizumab discontinuous (n=156) |                                    | Bevacizumab continuous (n=150) |                                    | Bevacizumab discontinuous (n=146) |                                    | Overall (n=610) |                                    |
|-------------------------------|--------------------------------|------------------------------------|-----------------------------------|------------------------------------|--------------------------------|------------------------------------|-----------------------------------|------------------------------------|-----------------|------------------------------------|
|                               | GM                             | Mean (SD) log <sub>e</sub> (sVEGF) | GM                                | Mean (SD) log <sub>e</sub> (sVEGF) | GM                             | Mean (SD) log <sub>e</sub> (sVEGF) | GM                                | Mean (SD) log <sub>e</sub> (sVEGF) | GM              | Mean (SD) log <sub>e</sub> (sVEGF) |
| <b>Visit 0</b>                |                                |                                    |                                   |                                    |                                |                                    |                                   |                                    |                 |                                    |
| sVEGF (including imputed)     | 154                            | 5.04 (0.78)                        | 164                               | 5.10 (0.84)                        | 173                            | 5.16 (0.90)                        | 182                               | 5.21 (0.81)                        | 168             | 5.12 (0.84)                        |
| Below detectable limit (n, %) | 3/152                          | 2.0%                               | 6/149                             | 4.0%                               | 8/143                          | 5.6%                               | 5/137                             | 3.6%                               | 22/581          | 3.8%                               |
| <b>Visit 1</b>                |                                |                                    |                                   |                                    |                                |                                    |                                   |                                    |                 |                                    |
| sVEGF (including imputed)     | 149                            | 5.01 (0.86)                        | 173                               | 5.15 (0.74)                        | 50                             | 3.92 (1.04)                        | 51                                | 3.93 (1.11)                        | 92              | 4.52 (1.11)                        |
| Below detectable limit (n, %) | 1/150                          | 0.7%                               | 4/150                             | 2.7%                               | 37/144                         | 25.7%                              | 35/135                            | 25.9%                              | 77/579          | 13.3%                              |
| <b>Visit 11</b>               |                                |                                    |                                   |                                    |                                |                                    |                                   |                                    |                 |                                    |
| sVEGF (including imputed)     | 112                            | 4.72 (1.10)                        | 120                               | 4.79 (1.14)                        | 42                             | 3.73 (1.17)                        | 57                                | 4.04 (1.43)                        | 76              | 4.33 (1.29)                        |
| Below detectable limit (n, %) | 12/126                         | 9.5%                               | 17/134                            | 12.7%                              | 49/122                         | 40.2%                              | 42/123                            | 34.1%                              | 120/505         | 23.8%                              |
| <b>Visit 12</b>               |                                |                                    |                                   |                                    |                                |                                    |                                   |                                    |                 |                                    |
| sVEGF (including imputed)     | 120                            | 4.79 (1.11)                        | 129                               | 4.86 (1.07)                        | 43                             | 3.77 (1.24)                        | 59                                | 4.08 (1.39)                        | 81              | 4.40 (1.28)                        |
| Below detectable limit (n, %) | 15/134                         | 11.2%                              | 11/135                            | 8.1%                               | 46/119                         | 38.7%                              | 37/123                            | 30.1%                              | 109/511         | 21.3%                              |
| <b>Visit 23</b>               |                                |                                    |                                   |                                    |                                |                                    |                                   |                                    |                 |                                    |
| sVEGF (including imputed)     | 101                            | 4.61 (1.09)                        | 113                               | 4.73 (1.10)                        | 31                             | 3.43 (1.23)                        | 43                                | 3.76 (1.37)                        | 64              | 4.16 (1.31)                        |
| Below detectable limit (n, %) | 14/122                         | 11%                                | 14/127                            | 11%                                | 65/112                         | 58%                                | 44/113                            | 39%                                | 137/474         | 29%                                |
| <b>Visit 24</b>               |                                |                                    |                                   |                                    |                                |                                    |                                   |                                    |                 |                                    |
| sVEGF (including imputed)     | 105                            | 4.65 (1.13)                        | 108                               | 4.68 (1.24)                        | 31                             | 3.44 (1.33)                        | 45                                | 3.81 (1.44)                        | 64              | 4.16 (1.39)                        |
| Below detectable limit (n, %) | 13/130                         | 10.0%                              | 15/132                            | 11.4%                              | 65/123                         | 52.8%                              | 49/120                            | 40.8%                              | 142/505         | 28.1%                              |

GM=geometric mean. SD=standard deviation. sVEGF= serum vascular endothelial growth factor. sVEGF values below 32 could not be detected; therefore values below the detectable limit were imputed from a uniform distribution between 0 and 32. SDs on the log<sub>e</sub> scale can be added or subtracted from the mean on the log<sub>e</sub> scale and exponentiated to calculate the approximate range within which 68% (1SD) or 95% (2SD) of the data points lie.
