# Supplementary material for: Serum Vascular Endothelial Growth Factor Levels in the IVAN Trial; Relationships with Drug, Dosing, and Systemic Serious Adverse Events
Source: PubMed Central journal article supplement — Ophthalmol Retina. 2018 Feb;2(2):118–27. doi: 10.1016/j.oret.2017.05.015 (PMC6278944; doi:10.1016/j.oret.2017.05.015), 2018-02
Supplement: mmc3.pdf [file mmc3.pdf]

**eTable 3 Geometric means sVEGF and mean and SD  $\log_e$ (sVEGF) at 12 months and 24 months by time since last treatment and number of injections**

|                                    | Ranibizumab |     |                               | Bevacizumab |     |                               |
|------------------------------------|-------------|-----|-------------------------------|-------------|-----|-------------------------------|
|                                    | n           | GM  | Mean (SD)<br>$\log_e$ (sVEGF) | n           | GM  | Mean (SD)<br>$\log_e$ (sVEGF) |
| <b>12 months</b>                   |             |     |                               |             |     |                               |
| <b>Months since last treatment</b> |             |     |                               |             |     |                               |
| <b>1</b>                           | 178/269     | 117 | 4.77 (1.12)                   | 182/242     | 38  | 3.63 (1.23)                   |
| <b>2</b>                           | 31/269      | 125 | 4.83 (0.79)                   | 19/242      | 78  | 4.36 (1.13)                   |
| <b>3+</b>                          | 60/269      | 141 | 4.95 (1.05)                   | 41/242      | 149 | 5.00 (1.04)                   |
| <b>Number of injections</b>        |             |     |                               |             |     |                               |
| <b>1-4</b>                         | 28/269      | 170 | 5.14 (1.02)                   | 16/242      | 137 | 4.92 (0.94)                   |
| <b>5-8</b>                         | 59/269      | 145 | 4.98 (0.97)                   | 54/242      | 53  | 3.98 (1.53)                   |
| <b>9-12</b>                        | 182/269     | 111 | 4.71 (1.10)                   | 172/242     | 45  | 3.81 (1.21)                   |
| <b>24 months</b>                   |             |     |                               |             |     |                               |
| <b>Months since last treatment</b> |             |     |                               |             |     |                               |
| <b>1</b>                           | 185/262     | 104 | 4.64 (1.23)                   | 169/243     | 26  | 3.25 (1.27)                   |
| <b>2</b>                           | 22/262      | 107 | 4.67 (1.16)                   | 24/243      | 63  | 4.14 (1.37)                   |
| <b>3+</b>                          | 55/262      | 121 | 4.79 (1.00)                   | 50/243      | 111 | 4.71 (1.13)                   |
| <b>Number of injections</b>        |             |     |                               |             |     |                               |
| <b>1-6</b>                         | 22/262      | 150 | 5.01 (1.11)                   | 21/243      | 105 | 4.65 (1.40)                   |
| <b>7-12</b>                        | 38/262      | 106 | 4.66 (1.13)                   | 28/243      | 39  | 3.66 (1.66)                   |
| <b>13-18</b>                       | 58/262      | 100 | 4.60 (1.31)                   | 46/243      | 42  | 3.74 (1.34)                   |
| <b>19-24</b>                       | 144/262     | 105 | 4.66 (1.14)                   | 148/243     | 31  | 3.44 (1.28)                   |

GM=geometric mean. SD=standard deviation. sVEGF= serum vascular endothelial growth factor. SDs on the  $\log_e$  scale can be added or subtracted from the mean on the  $\log_e$  scale and exponentiated to calculate the approximate range within which 68% (1SD) or 95% (2SD) of the data points lie.
