# Supplementary material for: Serum Vascular Endothelial Growth Factor Levels in the IVAN Trial; Relationships with Drug, Dosing, and Systemic Serious Adverse Events
Source: PubMed Central journal article supplement — Ophthalmol Retina. 2018 Feb;2(2):118–27. doi: 10.1016/j.oret.2017.05.015 (PMC6278944; doi:10.1016/j.oret.2017.05.015), 2018-02
Supplement: mmc4.pdf [file mmc4.pdf]

**eTable 4 Geometric means sVEGF and mean and SD  $\log_e$ (sVEGF) across study visits by SSAE group**

|                               | IME<br>(n=25) |                               | ATE<br>(n=53) |                               | OTH<br>(n=104) |                               | No SSAEs<br>(n=449) |                               |
|-------------------------------|---------------|-------------------------------|---------------|-------------------------------|----------------|-------------------------------|---------------------|-------------------------------|
|                               | GM            | Mean (SD)<br>$\log_e$ (sVEGF) | GM            | Mean (SD)<br>$\log_e$ (sVEGF) | GM             | Mean (SD)<br>$\log_e$ (sVEGF) | GM                  | Mean (SD)<br>$\log_e$ (sVEGF) |
| <b>Visit 0</b>                |               |                               |               |                               |                |                               |                     |                               |
| sVEGF (including imputed)     | 173           | 5.16 (0.83)                   | 210           | 5.35 (0.91)                   | 164            | 5.10 (1.02)                   | 166                 | 5.11 (0.79)                   |
| Below detectable limit (n, %) | 1/24          | 4.2%                          | 1/47          | 2.1%                          | 6/83           | 7.2%                          | 14/427              | 3.3%                          |
| <b>Visit 1</b>                |               |                               |               |                               |                |                               |                     |                               |
| sVEGF (including imputed)     | 90            | 4.50 (0.71)                   | 115           | 4.75 (1.11)                   | 96             | 4.57 (1.06)                   | 90                  | 4.50 (1.13)                   |
| Below detectable limit (n, %) | 1/21          | 4.8%                          | 4/47          | 8.5%                          | 13/83          | 15.7%                         | 59/428              | 13.8%                         |
| <b>Visit 11</b>               |               |                               |               |                               |                |                               |                     |                               |
| sVEGF (including imputed)     | 132           | 4.88 (0.92)                   | 98            | 4.58 (1.88)                   | 73             | 4.29 (1.48)                   | 74                  | 4.31 (1.21)                   |
| Below detectable limit (n, %) | 2/20          | 10.0%                         | 8/34          | 23.5%                         | 19/66          | 28.8%                         | 91/385              | 23.6%                         |
| <b>Visit 12</b>               |               |                               |               |                               |                |                               |                     |                               |
| sVEGF (including imputed)     | 62            | 4.13 (1.79)                   | 152           | 5.02 (1.24)                   | 83             | 4.42 (1.24)                   | 80                  | 4.38 (1.27)                   |
| Below detectable limit (n, %) | 6/17          | 35.3%                         | 5/36          | 13.9%                         | 17/71          | 23.9%                         | 81/387              | 20.9%                         |
| <b>Visit 23</b>               |               |                               |               |                               |                |                               |                     |                               |
| sVEGF (including imputed)     | 80            | 4.38 (0.90)                   | 88            | 4.47 (1.21)                   | 78             | 4.36 (1.34)                   | 61                  | 4.12 (1.32)                   |
| Below detectable limit (n, %) | 3/14          | 21.4%                         | 5/24          | 20.8%                         | 16/62          | 25.8%                         | 113/374             | 30.2%                         |
| <b>Visit 24</b>               |               |                               |               |                               |                |                               |                     |                               |
| sVEGF (including imputed)     | 77            | 4.35 (1.40)                   | 91            | 4.51 (1.02)                   | 78             | 4.36 (1.26)                   | 61                  | 4.11 (1.42)                   |
| Below detectable limit (n, %) | 4/17          | 23.5%                         | 5/27          | 18.5%                         | 15/63          | 23.8%                         | 118/398             | 29.6%                         |

GM=geometric mean. SD=standard deviation. sVEGF= serum vascular endothelial growth factor. SSAE=systemic serious adverse event. There are 20 patients who appear in more than one SSAE category above; see Figure 4 for details. sVEGF values below 32 could not be detected; therefore values below the detectable limit were imputed from a uniform distribution between 0 and 32. SDs on the  $\log_e$  scale can be added or subtracted from the mean on the  $\log_e$  scale and exponentiated to calculate the approximate range within which 68% (1SD) or 95% (2SD) of the data points lie.
